# Supplementary material for: Synthesis and Acid-Responsiveness of an Insulated π-Conjugated Polymer Containing Spiropyrans in Its Backbone
Source: PubMed Central journal article supplement (PMC6480293; doi:10.3390/molecules24071301), 2019-04-03
Supplement: molecules-24-01301-s001.pdf [file molecules-24-01301-s001.pdf]

# Supporting Information

## Synthesis and Acid-Responsiveness of an Insulated $\pi$ -Conjugated Polymer Containing Spiropyrans in Its Backbone

**Hiromichi V. Miyagishi, Takashi Tamaki, Hiroshi Masai, Jun Terao \***

Department of Basic Science, Graduate School of Arts and Sciences, The University of Tokyo, 3-8-1 Komaba, Meguro-ku, Tokyo 153-8902, Japan.

\*Correspondence: [cterao@mail.ecc.u-tokyo.ac.jp](mailto:cterao@mail.ecc.u-tokyo.ac.jp)

# Table of Contents

|                                                                               |    |
|-------------------------------------------------------------------------------|----|
| <b>1. General Remarks</b> .....                                               | 3  |
| 1.1 Materials .....                                                           | 3  |
| 1.2 Experimental equipment and procedures .....                               | 3  |
| <b>2. Synthetic procedures</b> .....                                          | 4  |
| 2.1 Synthesis of compound <b>1</b> .....                                      | 4  |
| 2.2 Synthesis of compound <b>2</b> .....                                      | 5  |
| 2.3 Synthesis of SP monomer <b>4</b> .....                                    | 5  |
| 2.4 Synthesis of PPE monomers <b>7</b> and <b>8</b> .....                     | 6  |
| 2.5 Synthesis of <i>unins</i> -SP-PPE .....                                   | 8  |
| 2.6 Preparation of films of <i>ins</i> -SP-PPE and <i>unins</i> -SP-PPE ..... | 8  |
| <b>3. NMR spectra</b> .....                                                   | 9  |
| 3.1 NMR spectra of <b>S1</b> .....                                            | 9  |
| 3.2 NMR spectra of <b>S2</b> .....                                            | 10 |
| 3.3 NMR spectrum of <b>2</b> .....                                            | 11 |
| 3.4 NMR spectra of <b>3</b> .....                                             | 12 |
| 3.5 NMR spectra of <b>4</b> .....                                             | 13 |
| 3.6 NMR spectra of <b>7</b> .....                                             | 14 |
| 3.7 NMR spectra of <b>8</b> .....                                             | 15 |
| 3.8 NMR spectra of <b>7</b> and <b>8</b> (aromatic region) .....              | 16 |
| 3.9 NMR spectra of <i>ins</i> -SP-PPE and <i>unins</i> -SP-PPE .....          | 17 |
| 3.10 NMR titration .....                                                      | 18 |
| <b>4. GPC charts</b> .....                                                    | 22 |
| <b>5. UV-Vis spectra</b> .....                                                | 24 |
| <b>6. Photoluminescence study</b> .....                                       | 24 |
| <b>5. References</b> .....                                                    | 25 |

## 1. General Remarks

### 1.1 Materials

Unless otherwise noted, manipulations were performed under nitrogen atmosphere using standard Schlenk-type glassware in a dual-manifold Schlenk line. Unless otherwise stated, commercially available chemicals were used as received. Reaction solvents were degassed by nitrogen bubbling, before using. Compound **5** [1] and unsubstituted SP [2] was prepared according to the previously reported procedure.

### 1.2 Experimental equipment and procedures

#### NMR spectroscopy

$^1\text{H}$  NMR (500 MHz) and  $^{13}\text{C}$   $\{^1\text{H}\}$  NMR (126 MHz) spectra were measured with a Bruker AVANCE-500 spectrometer. The  $^1\text{H}$ -NMR chemical shifts are reported relative to tetramethylsilane (TMS) (0.00 ppm). The  $^{13}\text{C}$ -NMR chemical shifts are reported relative to TMS (0.00 ppm) or deuterated solvents (77.16 ppm for  $\text{CDCl}_3$ ).

#### High-Resolution Mass Spectroscopy (HR-MS)

Electrospray ionization time-of-flight (ESI-TOF) mass spectra were obtained using a Waters Xev G2-S ToF mass spectrometer.

#### Analytical gel permeation chromatography (Analytical GPC)

Analytical GPC was performed with a GL-Science GL-7400 HPLC System equipped with Shodex KF-802, -802.5, -803 columns, a GL-7410 HPLC pump, a GL-7400 UV detector, and a GL-7454 RI detector using THF as eluent at a flow rate of  $0.6 \text{ mL min}^{-1}$ . Average molecular weights of polymers were estimated with polystyrenes as calibration standards.

#### Preparative recycling gel permeation chromatography (Preparative GPC)

Preparative recycling GPC was performed with a SHIMADZU LC-20AP System equipped with a Shodex K-4002L or K-4003L column, a SHIMADZU SPD-20A, and a SHIMADZU RID-10A, using  $\text{CHCl}_3$  as the eluent at a flow rate of  $14 \text{ mL min}^{-1}$ .

#### UV-Vis spectroscopy

UV-Vis spectra were measured with a SHIMADZU UV-2600 spectrophotometer using  $\text{CH}_2\text{Cl}_2$  as the solvent. For UV-Vis titration, trifluoroacetic acid (TFA,  $4.6 \mu\text{L} \times 10$ ) or triethylamine (TEA,  $8.5 \mu\text{L} \times 10$ ) was added into the solution of samples ( $2.0 \times 10^{-5} \text{ M}$ , 3 mL). For repeated test of the acidochromism, small excess amounts of TFA and TEA were added into the solution of samples ( $2.0 \times 10^{-5} \text{ M}$ , 3 mL). The amounts of TFA and TEA were summarized below. 1<sup>st</sup> cycle: TFA  $46 \mu\text{L}$  and TEA  $40 \mu\text{L}$ . 2<sup>nd</sup> cycle: TFA  $51 \mu\text{L}$  and TEA  $44 \mu\text{L}$ . 3<sup>rd</sup> cycle:  $56 \mu\text{L}$  and  $48 \mu\text{L}$ . 4<sup>th</sup> cycle:  $62 \mu\text{L}$  and  $53 \mu\text{L}$ . 5<sup>th</sup> cycle:  $68 \mu\text{L}$  and  $59 \mu\text{L}$ .

## Photoluminescence spectroscopy

Fluorescence spectra were measured with a HITACHI F-7000 model equipped with a 150 W Xenon lamp using CH<sub>2</sub>Cl<sub>2</sub> as the solvent. **Titration experiments were conducted with the same method as the UV-Vis titration.**

## Quantum Yield measurement

Absolute quantum yields were determined by a calibrated integrating sphere system (Hamamatsu C11347). This system consists of an excitation light source, a sample holder mounted in an integrating sphere and a multi-channel CCD spectrometer.

## 2. Synthetic procedures

### 2.1 Synthesis of compound 1

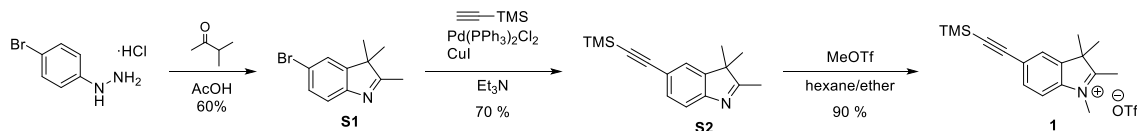

**Scheme S1.** Synthesis of compound 1.

**Compound S1.** To a solution of 4-bromophenylhydrazine hydrochloride (1.00 g, 4.28 mmol, 1.0 eq.) in acetic acid (14 mL), 3-methylbutan-2-one (0.692 mL, 6.42 mmol, 1.5 eq.) was added. The mixture was heated under reflux for 21 h. After the mixture cooled to room temperature, the solvent was removed in vacuum. The residue was diluted with dichloromethane (40 mL) and saturated NaHCO<sub>3</sub> aq., and extracted with dichloromethane (2 × 40 mL). The organic layers were combined, washed with brine, dried over Na<sub>2</sub>SO<sub>4</sub>, filtered, and evaporated in vacuum. The residue was purified by flash column chromatography eluting with hexane/EtOAc (3:2) to afford product **S1** as brown oil (614 mg, 60%); <sup>1</sup>H-NMR (500 MHz; CDCl<sub>3</sub>): δ = 7.43-7.38 (m, 3H), 2.26 (s, 3H), 1.30 (s, 6H). <sup>13</sup>C-NMR (126 MHz; CDCl<sub>3</sub>): δ = 188.4, 152.7, 147.8, 130.6, 124.8, 121.3, 118.8, 54.1, 22.9, 15.4. The <sup>1</sup>H-NMR and <sup>13</sup>C-NMR spectra were consistent with those previously reported [3].

**Compound S2.** This compound was synthesized according to the previously published procedures [4]; <sup>1</sup>H-NMR (500 MHz; CDCl<sub>3</sub>): δ = 7.45-7.42 (m, 2H), 7.39 (s, 1H), 2.28 (s, 3H), 1.29 (s, 6H), 0.26 (s, 9H). <sup>13</sup>C-NMR (126 MHz; CDCl<sub>3</sub>): δ = 189.6, 154.1, 145.8, 132.1, 125.2, 119.88, 119.75, 105.7, 93.9, 53.9, 23.1, 15.7, 0.2. The <sup>1</sup>H-NMR and <sup>13</sup>C-NMR spectra were consistent with those previously reported [4].

**Compound 1.** To a solution of **S2** (250 mg, 1.02 mmol, 1.0 eq.) in dehydrated hexane (1.3 mL) and diethyl ether (1.9 mL), methyl trifluoromethanesulfonate (134.1  $\mu$ L, 1.22 mmol, 1.2 eq.) was added. Instantly, a white precipitate formed. The solid was filtered off and washed with cold diethyl ether. The solid was dried in vacuum to afford product **1** as a white solid (369 mg). This compound was used in the next reaction without further purification.

## 2.2 Synthesis of compound 2

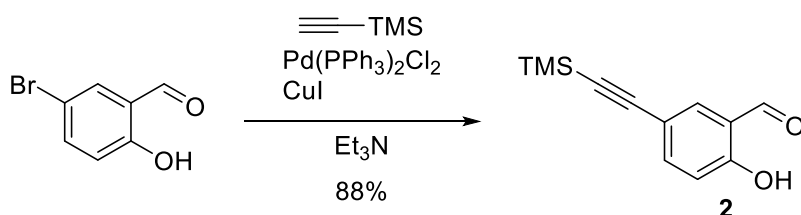

**Scheme S2.** Synthesis of compound **2**.

**Compound 2.** This compound was synthesized according to the previously published procedures [5]; <sup>1</sup>H-NMR (500 MHz; CDCl<sub>3</sub>):  $\delta$  = 11.10 (s, 1H), 9.85 (s, 1H), 7.70 (d,  $J$  = 1.9 Hz, 1H), 7.60 (dd,  $J$  = 8.6, 2.1 Hz, 1H), 6.93 (d,  $J$  = 8.7 Hz, 1H), 0.25 (s, 9H). The <sup>1</sup>H-NMR data were consistent with that previously reported [5].

## 2.3 Synthesis of SP monomer 4

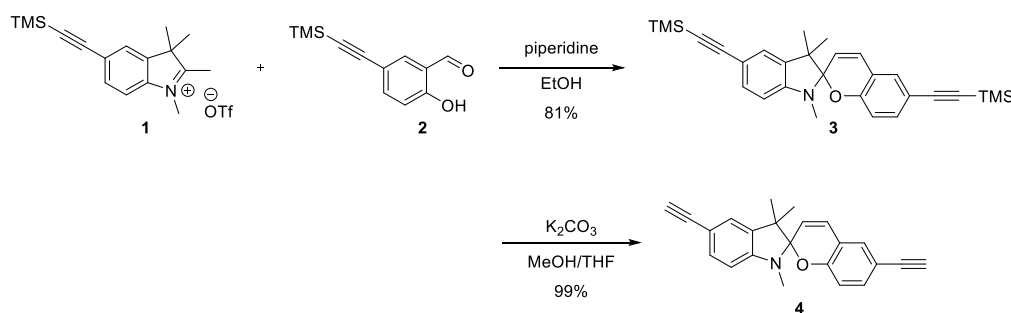

**Scheme S3.** Synthesis of SP monomer **4**.

**Compound 3.** To a solution of **1** (369 mg, 0.879 mmol, 1.0 eq.) and **2** (192 mg, 0.879 mmol, 1.0 eq.) in ethanol (8.8 mL), piperidine (95.7  $\mu$ L, 0.967 mmol, 1.1 eq.) was added and then heated under reflux for 4 h. After the mixture cooled to room temperature, the solvent was evaporated in vacuum. The residue was filtrated through SiO<sub>2</sub> gel with hexane/EtOAc (19:1) and the eluent was evaporated in vacuum. The residue was recrystallized from EtOH to afford product **3** as a white solid (335 mg, 81%); <sup>1</sup>H-NMR

(500 MHz; CDCl<sub>3</sub>):  $\delta$  = 7.32 (dd,  $J$  = 8.0, 1.5 Hz, 1H, ArH), 7.21 (dd,  $J$  = 8.3, 2.0 Hz, 1H, ArH), 7.19 (d,  $J$  = 1.8 Hz, 1H, ArH), 7.16 (d,  $J$  = 1.4 Hz, 1H, ArH), 6.80 (d,  $J$  = 10.3 Hz, 1H, -CH=CH-), 6.59 (d,  $J$  = 8.3 Hz, 1H, ArH), 6.41 (d,  $J$  = 8.0 Hz, 1H, ArH), 5.67 (d,  $J$  = 10.2 Hz, 1H, -CH=CH-), 2.70 (s, 3H, N-CH<sub>3</sub>), 1.25 (s, 3H, *gem*-CH<sub>3</sub>), 1.13 (s, 3H, *gem*-CH<sub>3</sub>), 0.24 (s, 9H, SiMe<sub>3</sub>), 0.23 (s, 9H, SiMe<sub>3</sub>). <sup>13</sup>C-NMR (126 MHz; CDCl<sub>3</sub>):  $\delta$  = 154.7, 148.5, 136.8, 133.9, 132.6, 130.6, 129.2, 125.5, 119.7, 118.7, 115.2, 115.0, 113.3, 106.77, 106.62, 105.1, 104.7, 92.5, 91.3, 51.8, 28.9, 25.8, 20.1, 0.35, 0.21. HR-MS (ESI-TOF-MS)  $m/z$ : [M+H]<sup>+</sup> calcd for C<sub>29</sub>H<sub>36</sub>NOSi<sub>2</sub> 470.2336, found 470.2334.

**Compound 4** A mixture of **3** (200 mg, 0.616 mmol, 1.00 eq) and K<sub>2</sub>CO<sub>3</sub> (400 mg, 2.89 mmol, 4.69 eq.) in MeOH (4 mL) and THF (4 mL) was stirred for 3 h at room temperature. The suspension was evaporated in vacuum and purified by column chromatography eluting with hexane/EtOAc (9:1) to afford product as a white solid (137 mg, 99%); <sup>1</sup>H-NMR (500 MHz; CDCl<sub>3</sub>):  $\delta$  = 7.38 (dd,  $J$  = 8.0, 1.6 Hz, 1H, ArH), 7.26 (dd,  $J$  = 8.4, 2.0 Hz, 1H, ArH), 7.24 (d,  $J$  = 2.0 Hz, 1H, ArH), 7.21 (d,  $J$  = 1.4 Hz, 1H, ArH), 6.85 (d,  $J$  = 10.3 Hz, 1H, -CH=CH-), 6.67 (d,  $J$  = 8.4 Hz, 1H, ArH), 6.47 (d,  $J$  = 8.0 Hz, 1H, ArH), 5.72 (d,  $J$  = 10.2 Hz, 1H, -CH=CH-), 3.02 (s, 1H, -C $\equiv$ CH), 3.00 (s, 1H, -C $\equiv$ CH), 2.76 (s, 3H, N-CH<sub>3</sub>), 1.30 (s, 3H, *gem*-CH<sub>3</sub>), 1.18 (s, 3H, *gem*-CH<sub>3</sub>). <sup>13</sup>C-NMR (126 MHz; CDCl<sub>3</sub>):  $\delta$  = 154.7, 148.5, 136.7, 133.8, 132.5, 130.6, 129.0, 125.5, 119.6, 118.6, 115.2, 113.7, 112.1, 106.5, 104.6, 84.9, 83.4, 75.6, 74.7, 51.7, 28.8, 25.7, 19.9. HR-MS (ESI-TOF-MS)  $m/z$ : [M+H]<sup>+</sup> calcd for C<sub>23</sub>H<sub>20</sub>NO 326.1545, found 326.1545.

#### 2.4 Synthesis of PPE monomers **7** and **8**

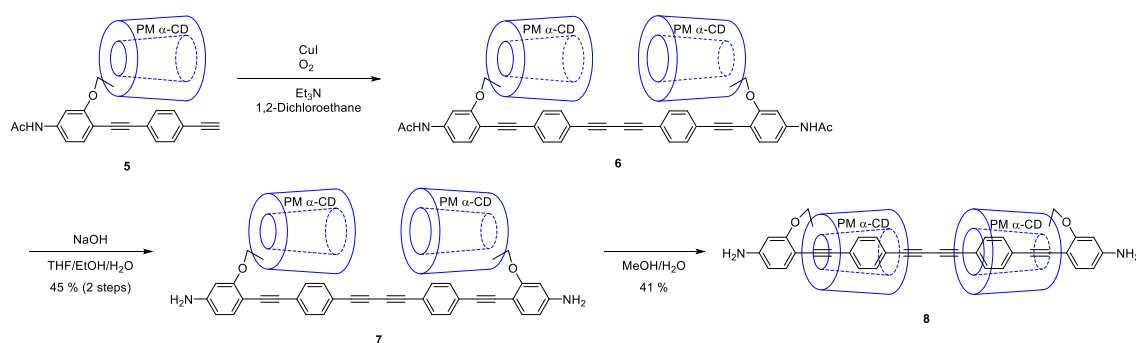

**Scheme S4.** Synthesis of PPE monomers **7** and **8**.

**Compound 6.** A mixture of **5** (300 mg, 0.204 mmol, 1.0 eq.) and CuI (1.25 g, 6.56 mmol, 32 eq.) in 1,2-dichloroethane (6 mL) and Et<sub>3</sub>N (13 mL) was heated for 13 h at 60 °C under air. After the mixture cooled to room temperature, saturated NH<sub>4</sub>Cl aq. (100 mL)

was added. The mixture was extracted with dichloromethane (2×50 mL) and then diethyl ether (50 mL). The combined organic layer was washed with saturated NH<sub>4</sub>Cl aq., and the aqueous layer was extracted with dichloromethane and diethyl ether. The combined organic layer was dried over MgSO<sub>4</sub>, filtrated, and evaporated in vacuum. The residue was purified by preparative GPC with chloroform as eluent to afford product **6** as a yellow solid (202 mg). This compound was used in the next reaction without further purification.

**Compound 7. 6** (202 mg, 68.8 μmol) was dissolved in THF (22.5 mL), EtOH (9 mL) and H<sub>2</sub>O (9 mL). To the solution, NaOH (7.2 g) was added and heated for 3 days at 40 °C. After the mixture cooled to room temperature, Brine (50 mL), H<sub>2</sub>O (30 mL), chloroform (100 mL) was added and extracted with chloroform (2×50 mL) and then diethyl ether (50 mL). The combined organic layer was dried over MgSO<sub>4</sub>, filtrated, and evaporated in vacuum. The residue was purified by preparative GPC with chloroform as eluent to afford product **7** as a yellow solid (131 mg, 2 steps 45%); <sup>1</sup>H-NMR (500 MHz; CDCl<sub>3</sub>): δ = 7.52 (d, *J* = 8.4 Hz, 4H, ArH), 7.45 (d, *J* = 8.4 Hz, 4H, ArH), 7.25 (d, *J* = 8.2 Hz, 2H, ArH), 6.24 (dd, *J* = 8.2, 1.7 Hz, 2H, ArH), 6.20 (d, *J* = 1.6 Hz, 2H, ArH), 5.16-3.05 (m, 190H, CD-H, OCH<sub>3</sub>, NH<sub>2</sub>). <sup>13</sup>C-NMR (126 MHz; CDCl<sub>3</sub>): δ = 160.7, 148.6, 134.3, 132.3 (peaks overlapped), 131.2 (peaks overlapped), 125.3, 120.3, 107.5, 102.5, 100.5, 100.25, 100.18, 100.09 (peaks overlapped), 99.6, 99.2, 91.4, 90.2, 82.74, 82.61, 82.52 (peaks overlapped), 82.37, 82.33, 82.20 (peaks overlapped), 82.13, 82.05, 82.02, 81.23 (peaks overlapped), 81.17 (peaks overlapped), 81.11, 75.3, 71.74, 71.61, 71.52, 71.50, 71.39 (peaks overlapped), 71.36 (peaks overlapped), 71.30 (peaks overlapped), 71.24 (peaks overlapped), 70.5, 67.7, 61.87, 61.80 (peaks overlapped), 61.73, 59.17, 59.06 (peaks overlapped), 59.02, 58.93, 58.3, 57.92, 57.90, 57.84, 57.81, 57.4. HR-MS (ESI-TOF-MS) *m/z*: [M+Na]<sup>+</sup> calcd for C<sub>138</sub>H<sub>204</sub>N<sub>2</sub>NaO<sub>60</sub> 2873.2905, found 2873.2903.

**Compound 8. 7** (185 mg, 64.9 μmol) was dissolved in MeOH (24 mL) and H<sub>2</sub>O (12 mL), heated overnight at 50 °C and then heated for 2 h at 60 °C. After the mixture cooled to room temperature, the solvent was removed in vacuum. The residue was dissolved in CHCl<sub>3</sub>, dried over MgSO<sub>4</sub>, filtrated, and evaporated in vacuum. The residue was purified by preparative GPC with chloroform as eluent to afford product **8** as a yellow solid (76.3 mg, 41%); <sup>1</sup>H-NMR (500 MHz; CDCl<sub>3</sub>): δ = 8.00 (d, *J* = 8.3 Hz, 4H, ArH), 7.61 (d, *J* = 8.3 Hz, 4H, ArH), 7.20 (d, *J* = 8.8 Hz, 2H, ArH), 6.45-6.43 (m, 4H, ArH), 5.10-2.88 (m, 190H, CD-H, OCH<sub>3</sub>, NH<sub>2</sub>). <sup>13</sup>C-NMR (126 MHz; CDCl<sub>3</sub>): δ = 163.5, 149.1, 134.2, 132.16 (peaks overlapped), 132.07 (peaks overlapped), 124.4, 121.2, 109.8, 107.8, 105.2,

100.7, 100.4, 100.13, 100.09, 99.9, 98.10, 98.03, 91.4, 90.6, 83.9, 82.65, 82.57 (peaks overlapped), 82.38, 82.22, 82.15, 82.14, 82.02 (peaks overlapped), 81.78, 81.70, 81.43, 81.28, 81.22, 81.19 (peaks overlapped), 81.05, 76.3, 75.2, 72.2, 71.83, 71.67, 71.48, 71.43, 71.22 (peaks overlapped), 71.16, 71.11, 71.02, 70.7, 70.2, 62.08, 62.01 (peaks overlapped), 61.83 (peaks overlapped), 61.77, 59.08, 59.05, 58.93, 58.74 (peaks overlapped), 58.4, 58.04, 57.89, 57.74, 57.67, 57.53. HR-MS (ESI-TOF-MS)  $m/z$ :  $[M+Na]^+$  calcd for  $C_{138}H_{204}N_2NaO_{60}$  2873.2905, found 2873.2898.

## 2.5 Synthesis of **unins-SP-PPE**.

**Unins-SP-PPE.** To a solution of PPE monomer **7** (75 mg, 26  $\mu$ mol, 1.0 eq.) in dehydrated acetonitrile (2.6 mL), *tert*-butyl nitrite (62  $\mu$ L, 0.53 mmol, 20 eq.) and trimethylsilyl azide (103  $\mu$ L, 0.79 mmol, 30 eq.) was added at 0 °C and then stirred for 2 h at room temperature. After reaction, the solvent was evaporated in vacuum. The residue was diluted with EtOAc and H<sub>2</sub>O, and extracted with EtOAc and diethyl ether. The combined organic layer was dried over MgSO<sub>4</sub>, filtrated and evaporated in vacuum to afford product as a yellow solid. Without further purification, the mixture of the solid, **4** (8.6 mg, 26  $\mu$ mol, 1.0 eq.), sodium ascorbate (31 mg, 0.16 mmol, 6.0 eq.), and CuSO<sub>4</sub>·5H<sub>2</sub>O (40 mg, 0.16 mmol, 6.0 eq.) in H<sub>2</sub>O (659  $\mu$ L) and *t*BuOH (659  $\mu$ L) was stirred overnight at room temperature. After the reaction, the mixture was diluted with chloroform and saturated NH<sub>4</sub>Cl aq., and extracted with chloroform. The combined layer was washed with saturated NaHCO<sub>3</sub> aq., dried over MgSO<sub>4</sub>, filtrated, and evaporated in vacuum. To remove the oligomers, the residue was purified by preparative GPC with chloroform as eluent to afford product **unins-SP-PPE** as a yellow solid (33 mg, 39%,  $M_w = 4.2 \times 10^4$ ,  $M_n = 3.0 \times 10^4$ , PDI = 1.4); <sup>1</sup>H-NMR (500 MHz; CDCl<sub>3</sub>):  $\delta$  = 8.13 (s, 2H, triazole-H), 7.73-7.46 (m, 14H, ArH), 6.98 (d, 5H, ArH, -CH=CH-), 6.81 (d, J = 8.0 Hz, 1H, ArH), 6.61 (d, J = 6.73 Hz, 1H, ArH), 5.78 (d, J = 9.9 Hz, 1H, -CH=CH-), 5.22-3.01 (m, 186H, CD-H, OCH<sub>3</sub>) 2.80 (s, 3H, N-CH<sub>3</sub>), 1.40 (s, 3H, *gem*-CH<sub>3</sub>), 1.26 (s, 3H, *gem*-CH<sub>3</sub>).

## 2.6 Preparation of films of **ins-SP-PPE** and **unins-SP-PPE**

Films of **ins-SP-PPE** and **unins-SP-PPE** were prepared by drop-casting 30  $\mu$ L of CHCl<sub>3</sub>-CH<sub>3</sub>CN (1:9) solution of the polymer ( $1 \times 10^{-4}$  M for the SP units) onto glass plates (1 cm×1 cm). After the drop-casting, the films were dried at room temperature.



### 3. NMR spectra

#### 3.1 NMR spectra of S1

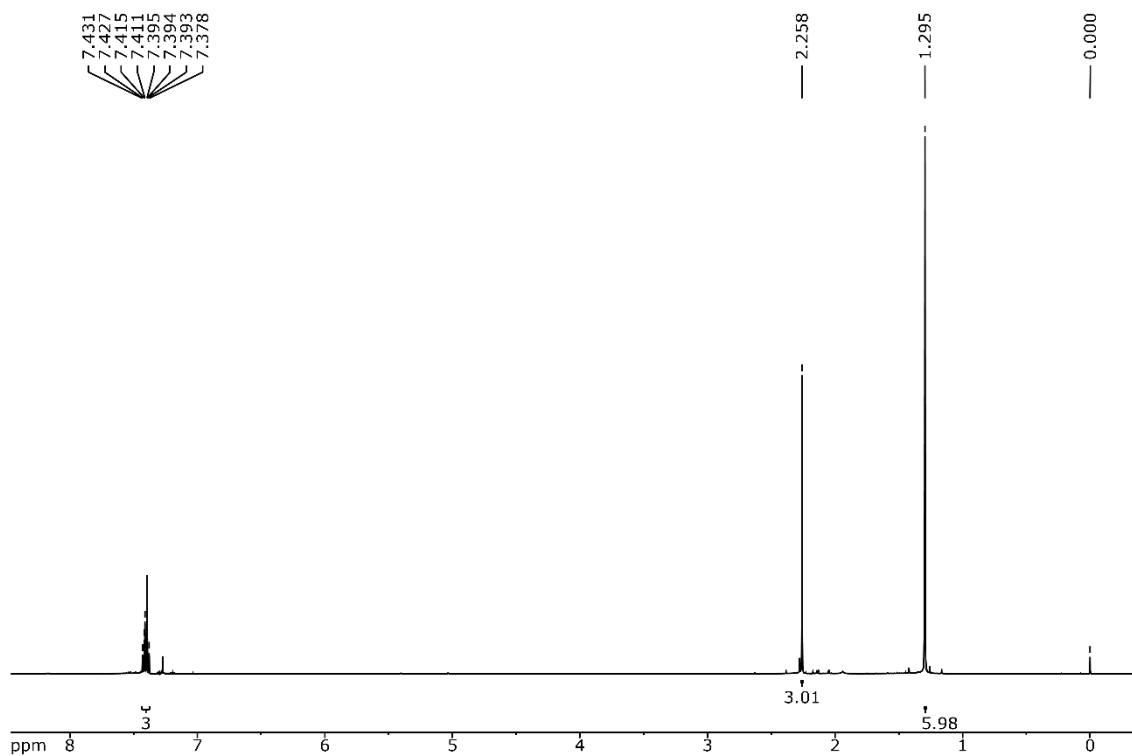

**Figure S1.**  $^1\text{H}$ -NMR spectrum of **S1** (500 MHz,  $\text{CDCl}_3$ ).

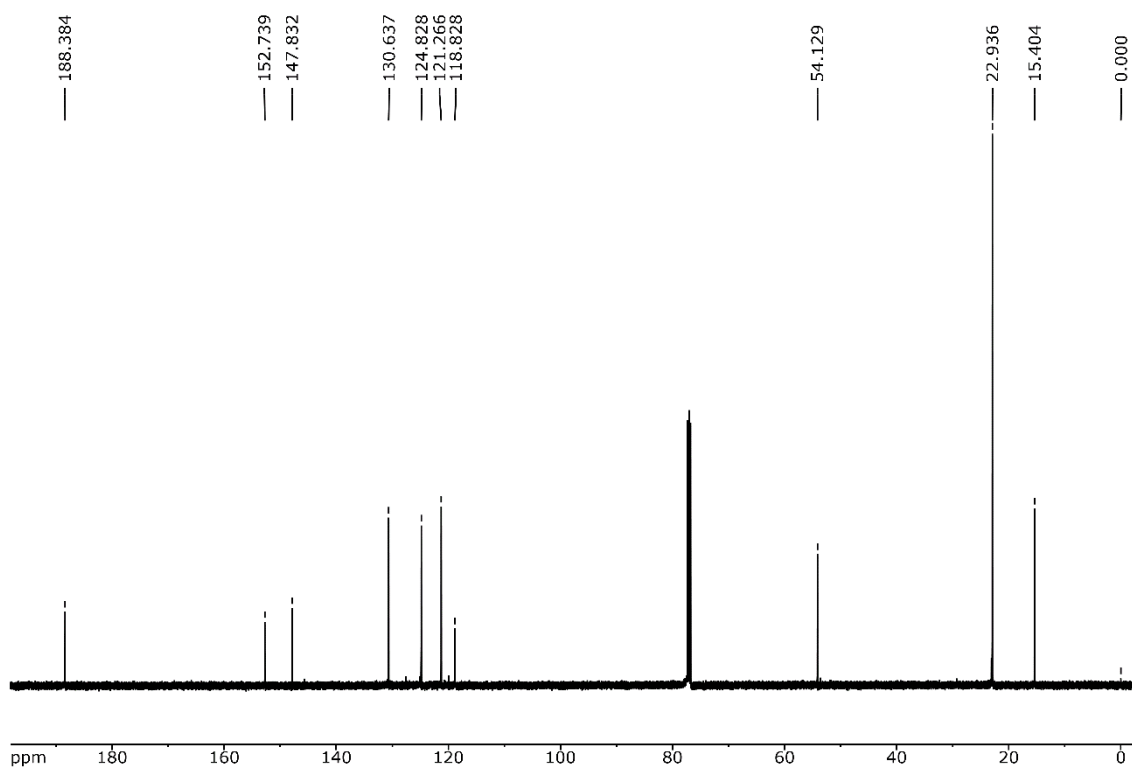

**Figure S2.**  $^{13}\text{C}$ -NMR spectrum of **S1** (126 MHz,  $\text{CDCl}_3$ ).

### 3.2 NMR spectra of **S2**

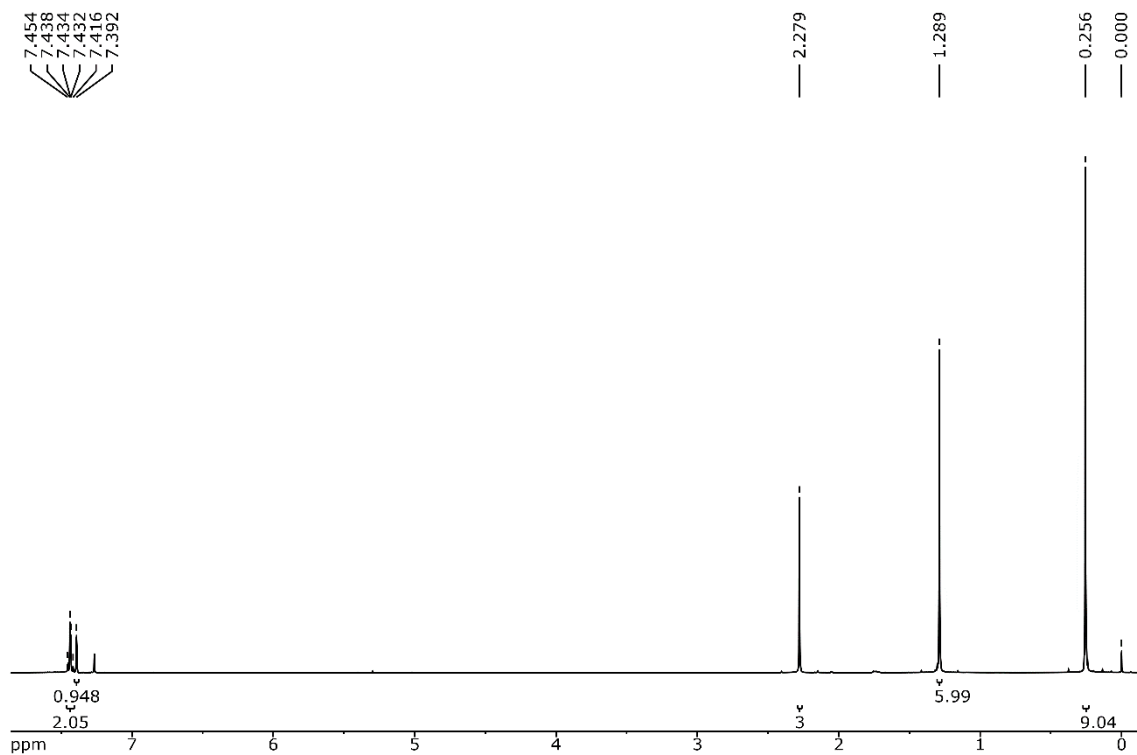

**Figure S3.**  $^1\text{H}$ -NMR spectrum of **S2** (500 MHz,  $\text{CDCl}_3$ ).

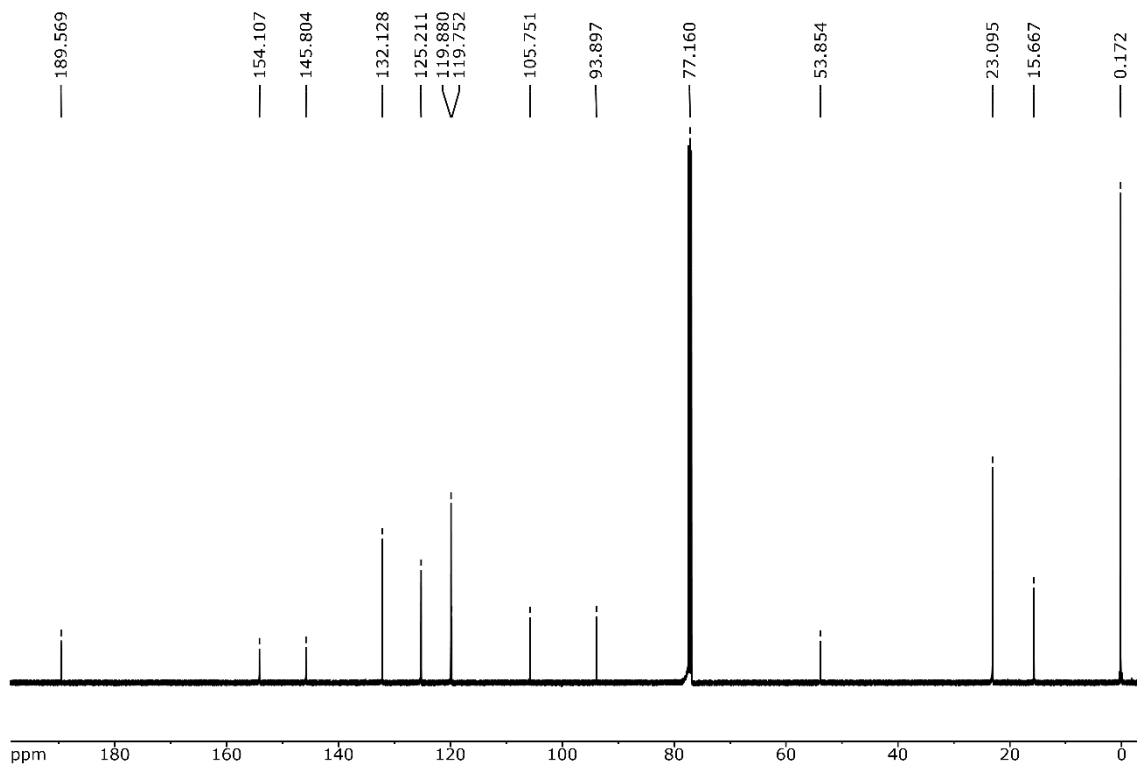

**Figure S4.**  $^{13}\text{C}$ -NMR spectrum of **S2** (126 MHz,  $\text{CDCl}_3$ ).

### 3.3 NMR spectrum of **2**

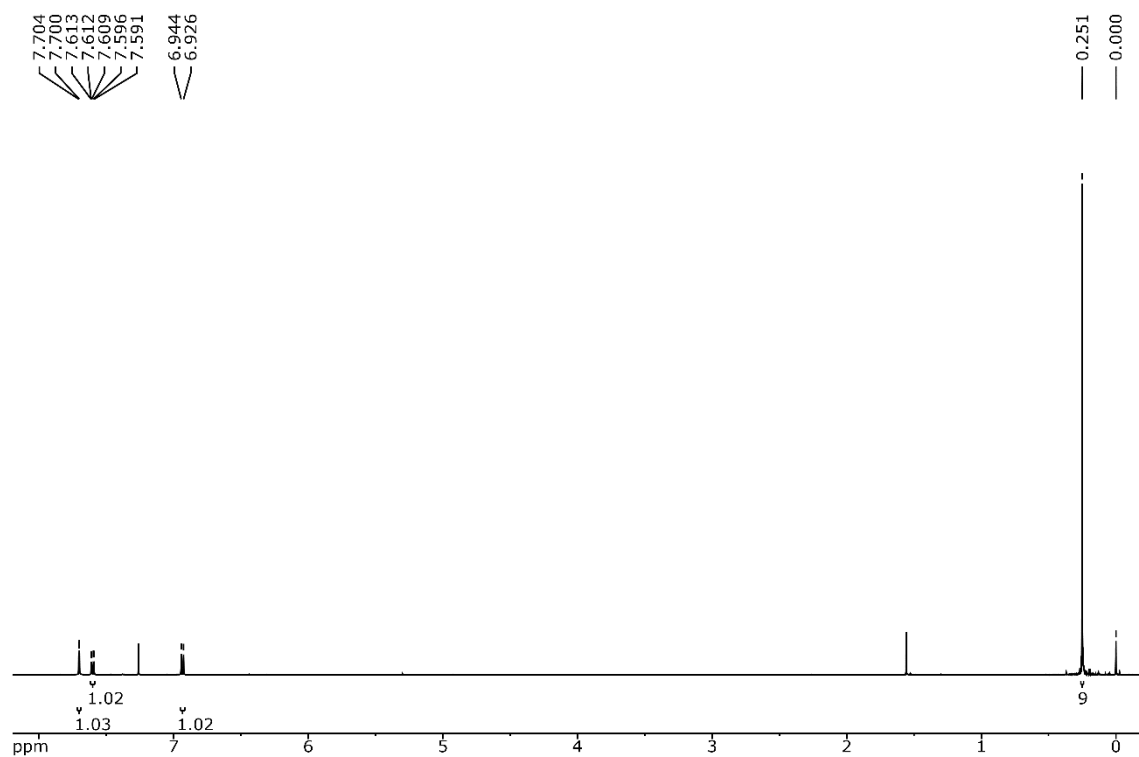

**Figure S5.**  $^1\text{H}$ -NMR spectrum of **2** (500 MHz,  $\text{CDCl}_3$ ).

### 3.4 NMR spectra of **3**

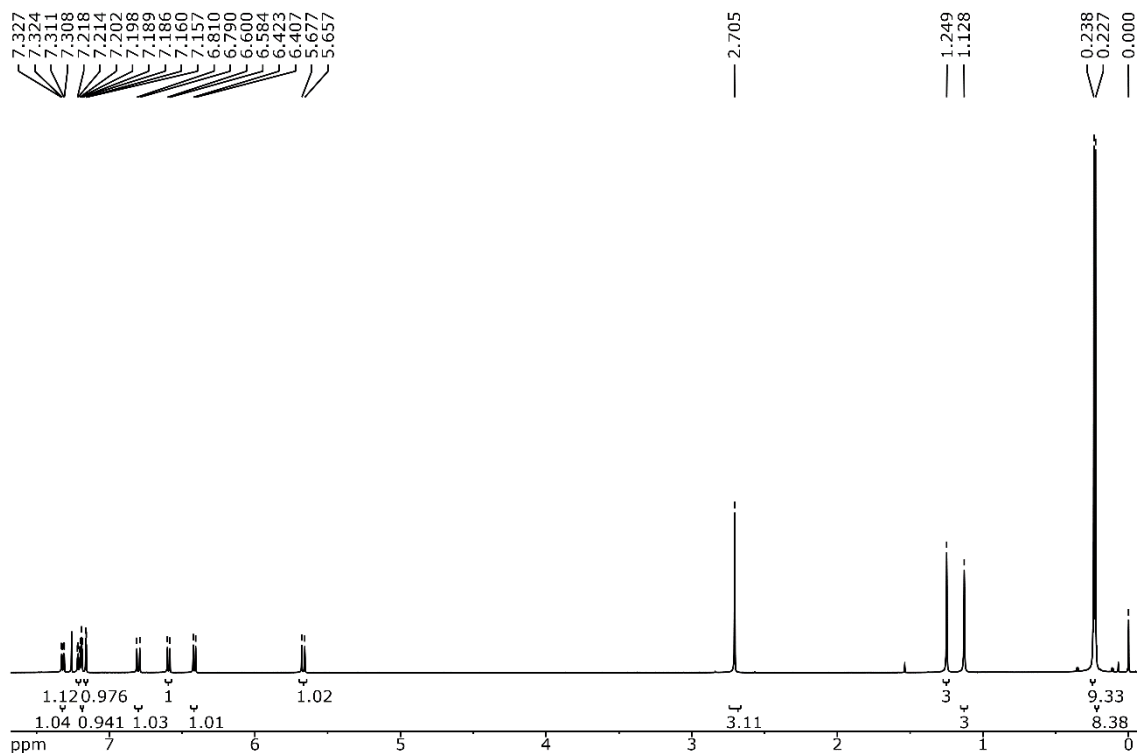

**Figure S6.**  $^1\text{H}$ -NMR spectrum of **3** (500 MHz,  $\text{CDCl}_3$ ).

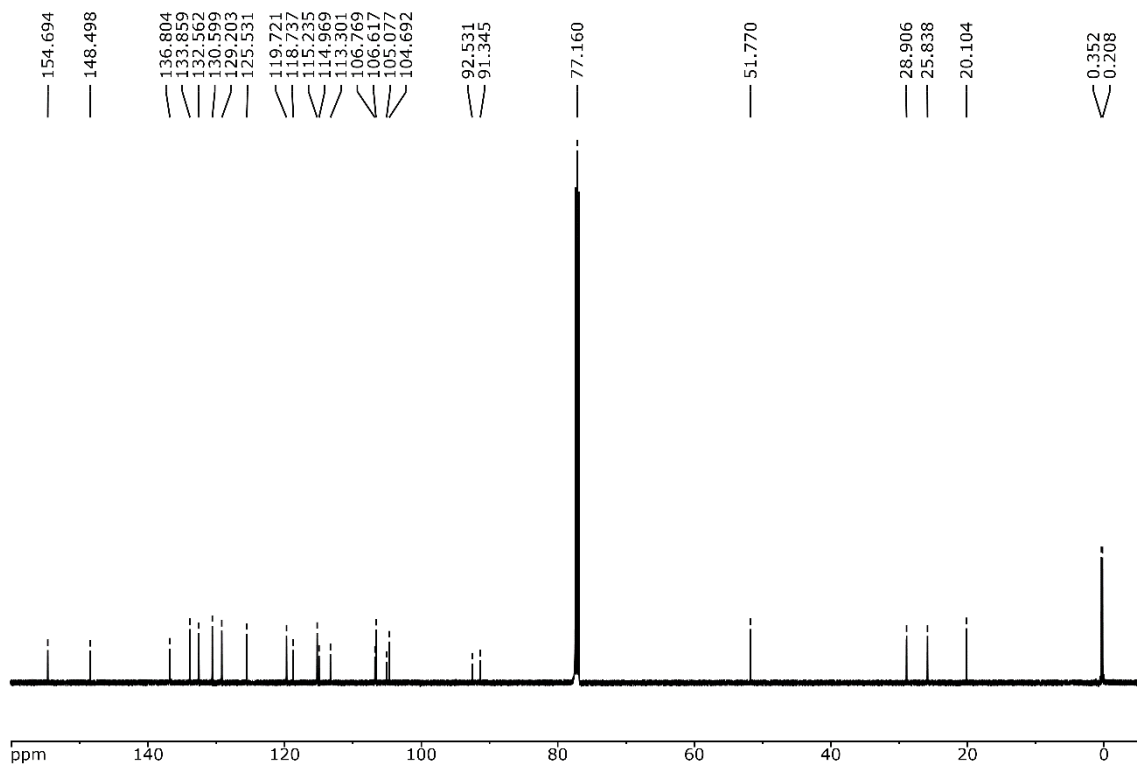

**Figure S7.**  $^{13}\text{C}$ -NMR spectrum of **3** (126 MHz,  $\text{CDCl}_3$ ).

3.5 NMR spectra of 4

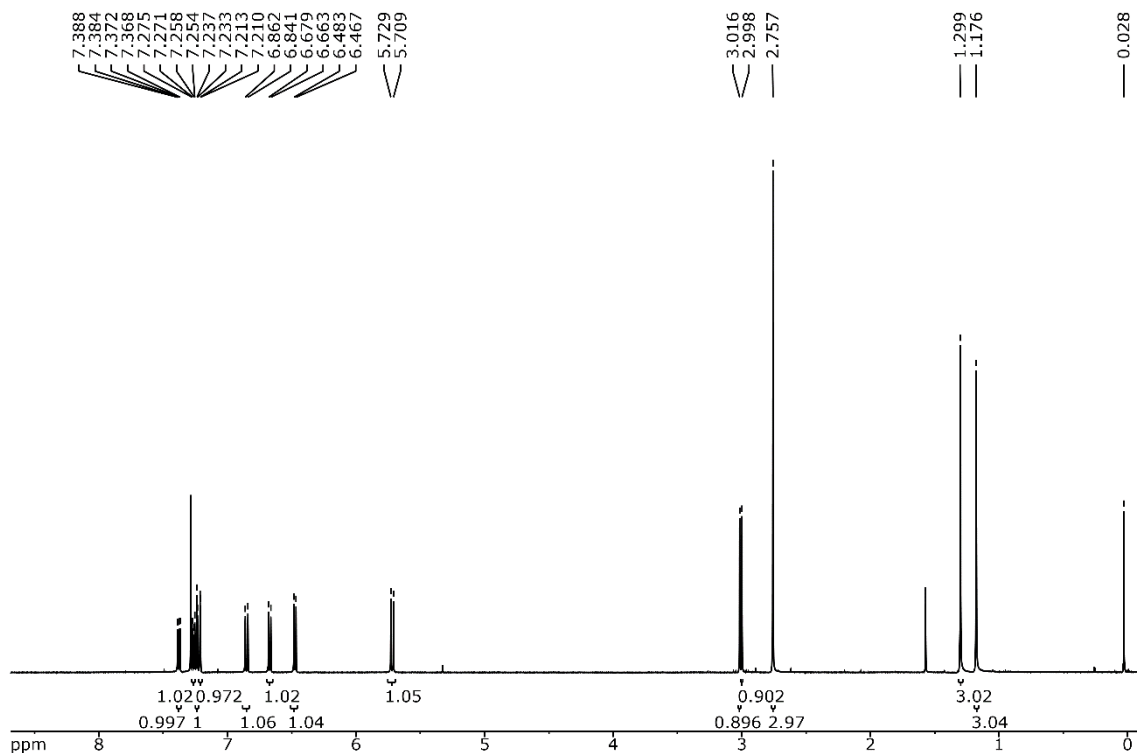

Figure S8. <sup>1</sup>H-NMR spectrum of 4 (500 MHz, CDCl<sub>3</sub>).

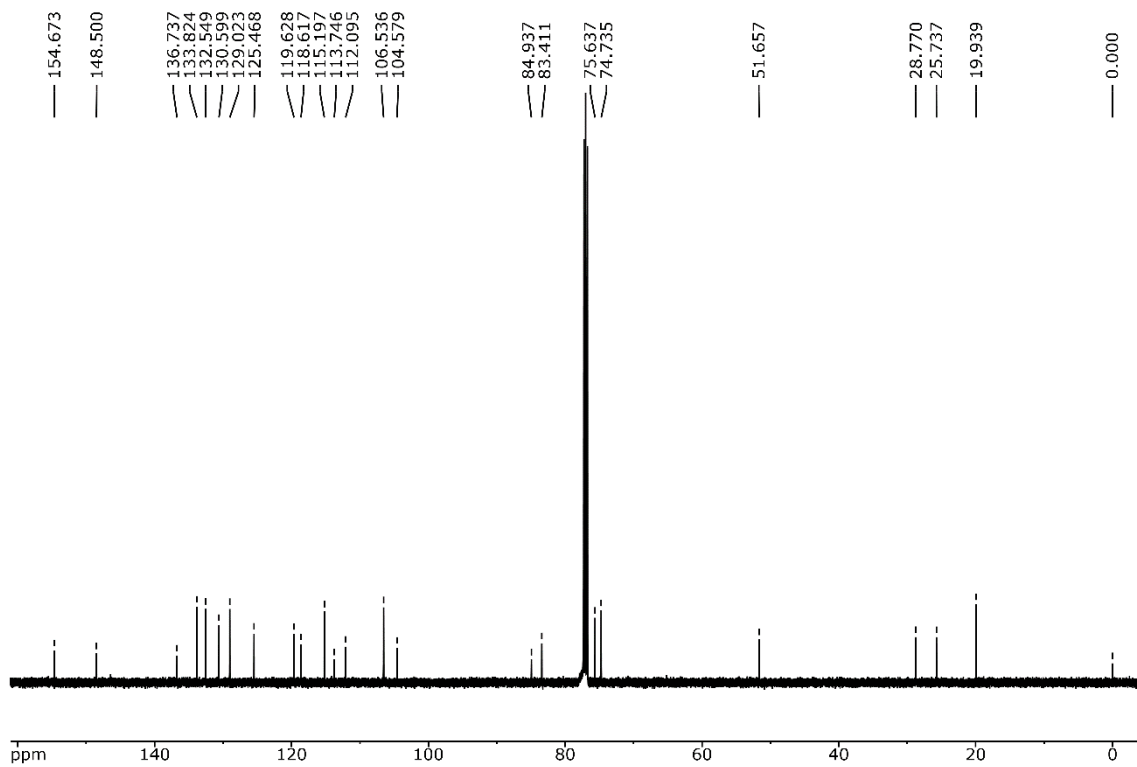

Figure S9. <sup>13</sup>C-NMR spectrum of 4 (126 MHz, CDCl<sub>3</sub>).

### 3.6 NMR spectra of 7

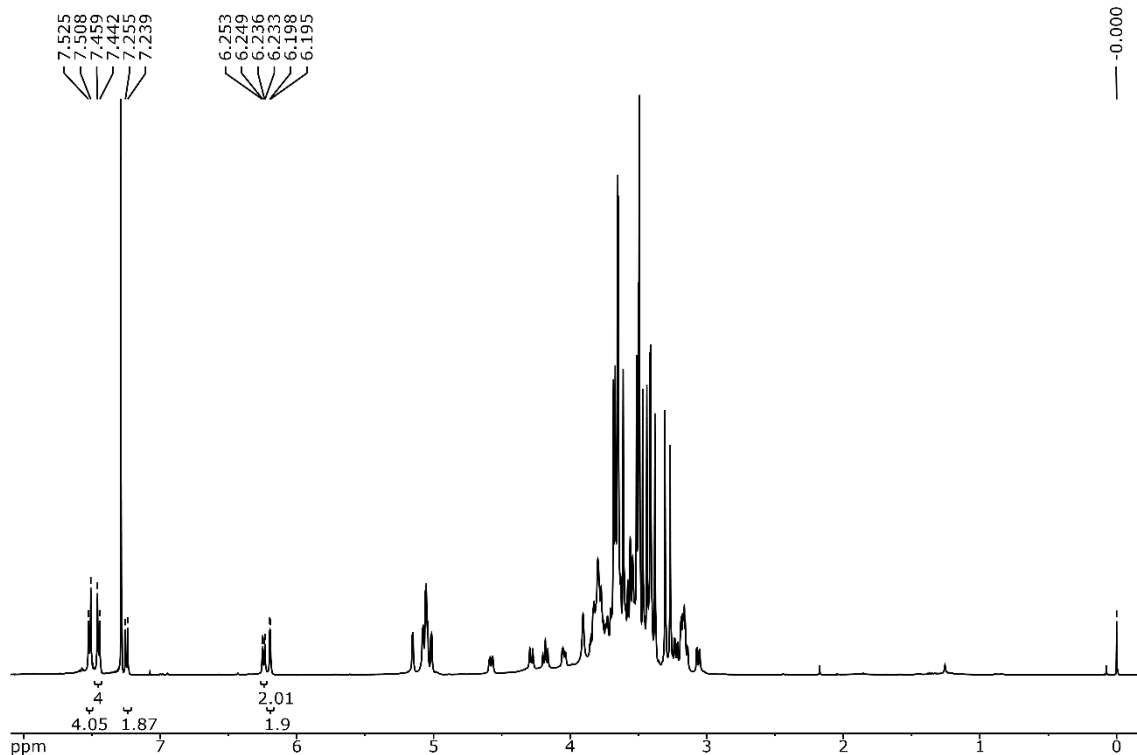

**Figure S10.**  $^1\text{H}$ -NMR spectrum of 7 (500 MHz,  $\text{CDCl}_3$ ).

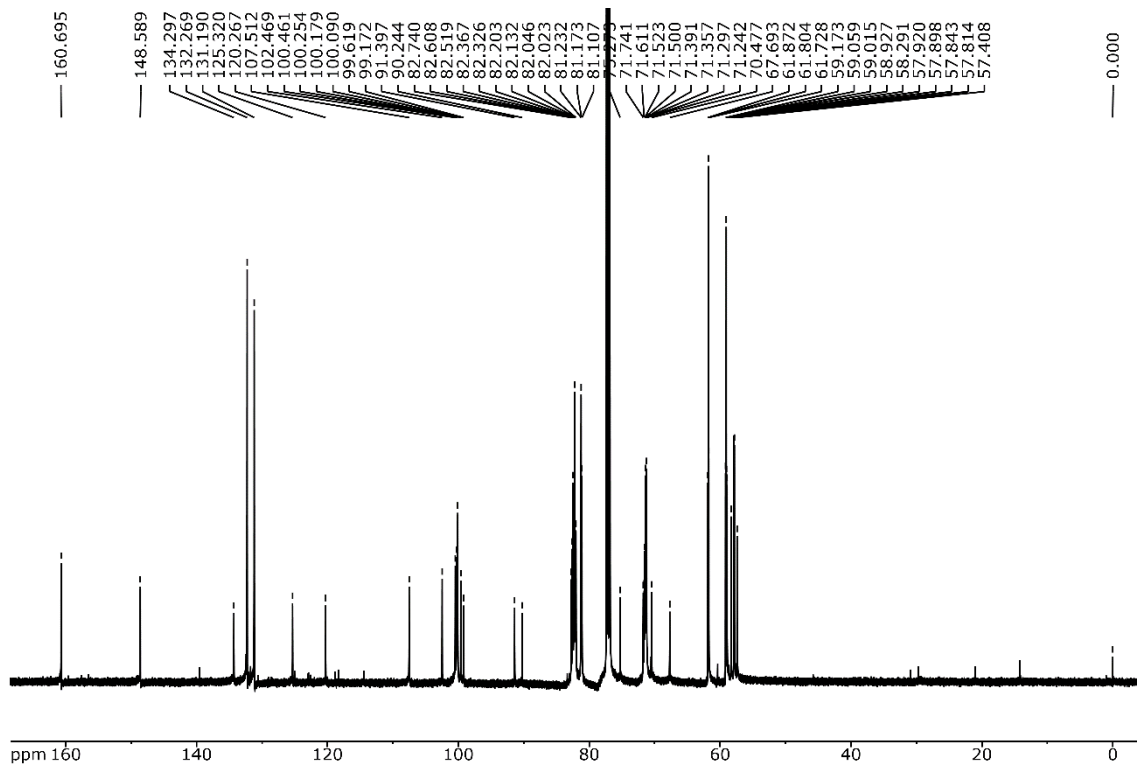

**Figure S11.**  $^{13}\text{C}$ -NMR spectrum of 7 (126 MHz,  $\text{CDCl}_3$ ).

3.7 NMR spectra of **8**

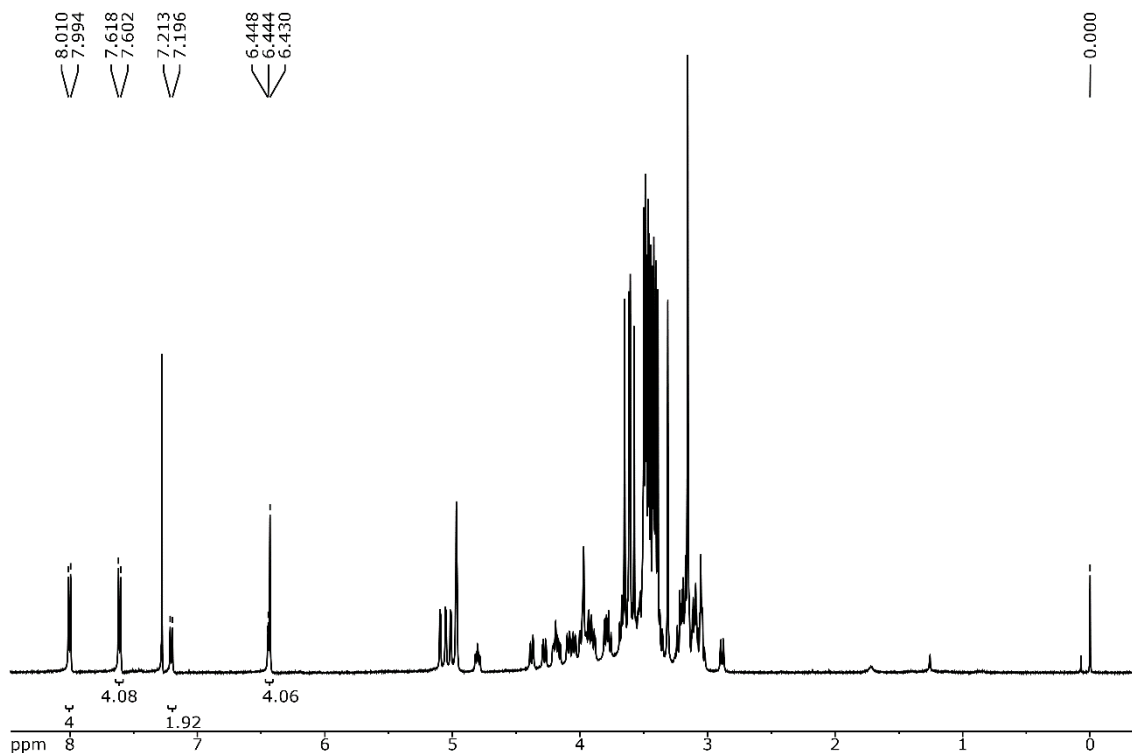

**Figure S12.**  $^1\text{H}$ -NMR spectrum of **8** (500 MHz,  $\text{CDCl}_3$ ).

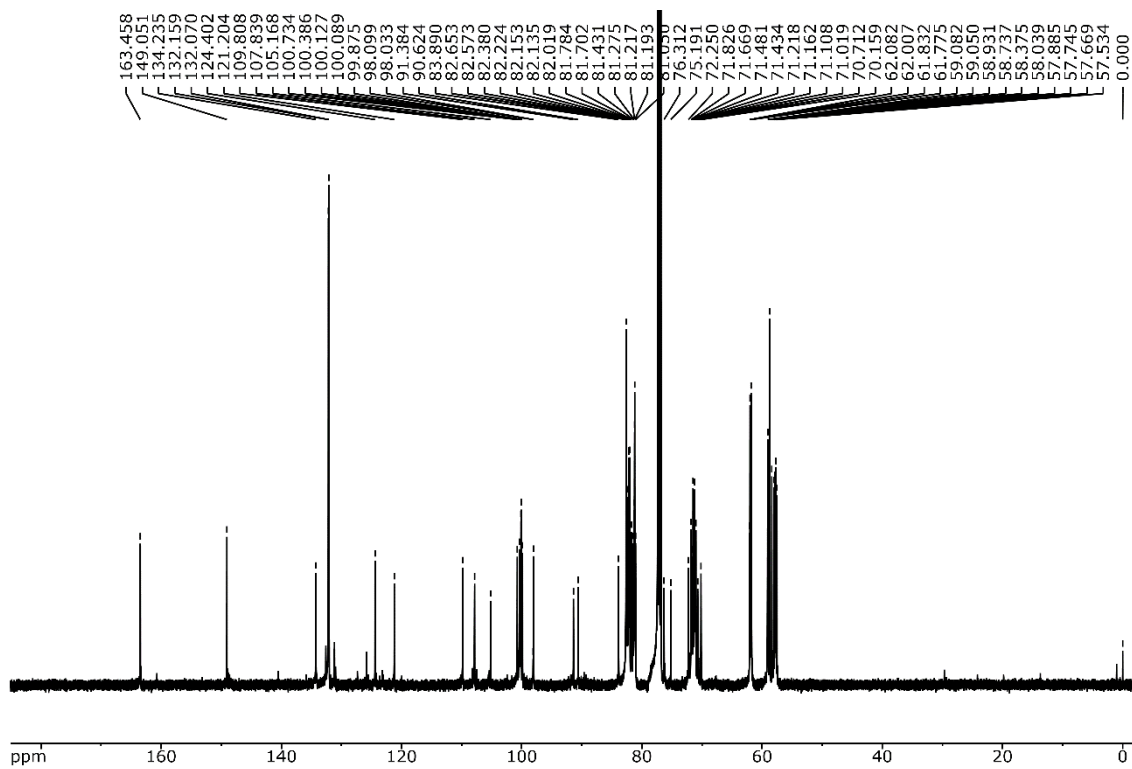

**Figure S13.**  $^{13}\text{C}$ -NMR spectrum of **8** (126 MHz,  $\text{CDCl}_3$ ).

### 3.8 NMR spectra of 7 and 8 (aromatic region)

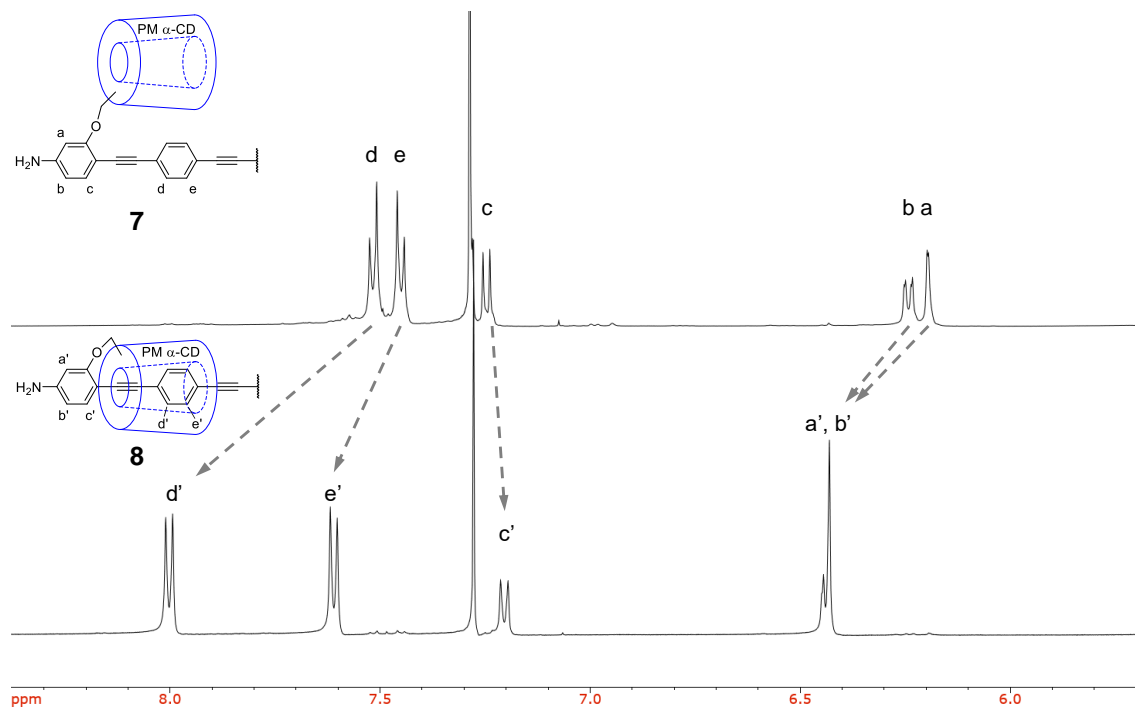

**Figure S14.** <sup>1</sup>H-NMR spectrum (aromatic region) of 7 and 8 (500 MHz, CDCl<sub>3</sub>).



3.9 NMR spectra of *ins*-SP-PPE and *unins*-SP-PPE

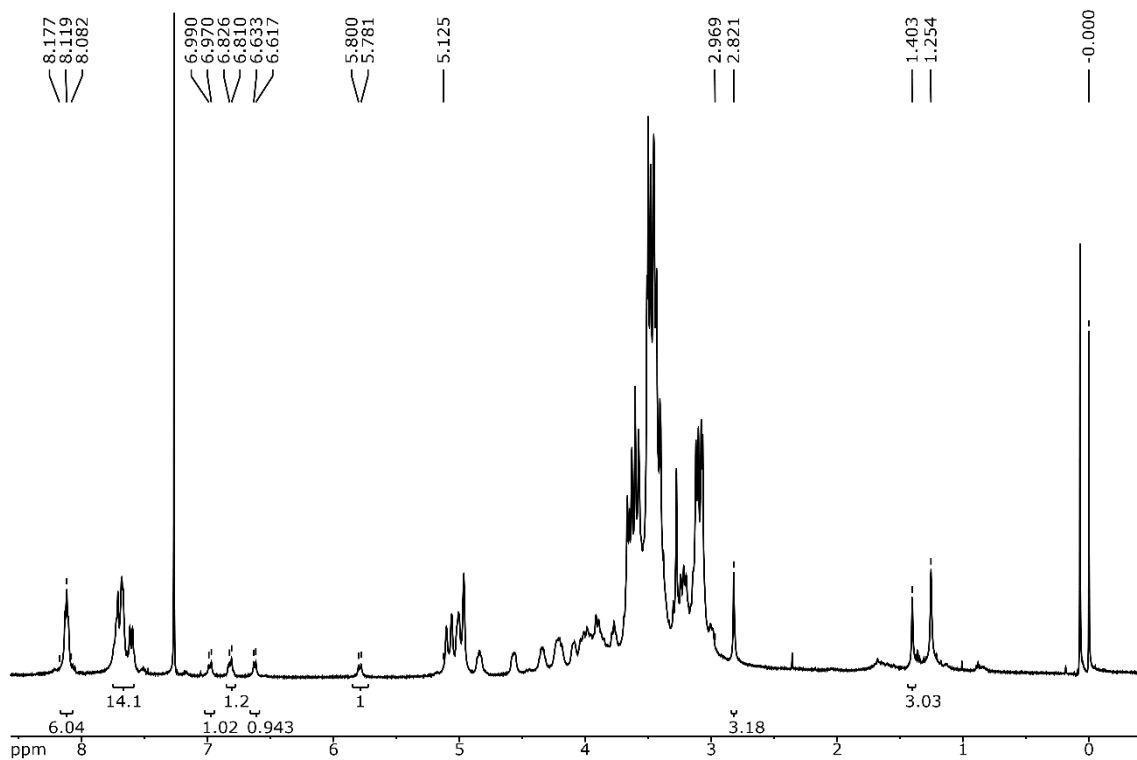

Figure S15.  $^1\text{H}$ -NMR spectrum of *ins*-SP-PPE (500 MHz,  $\text{CDCl}_3$ ).

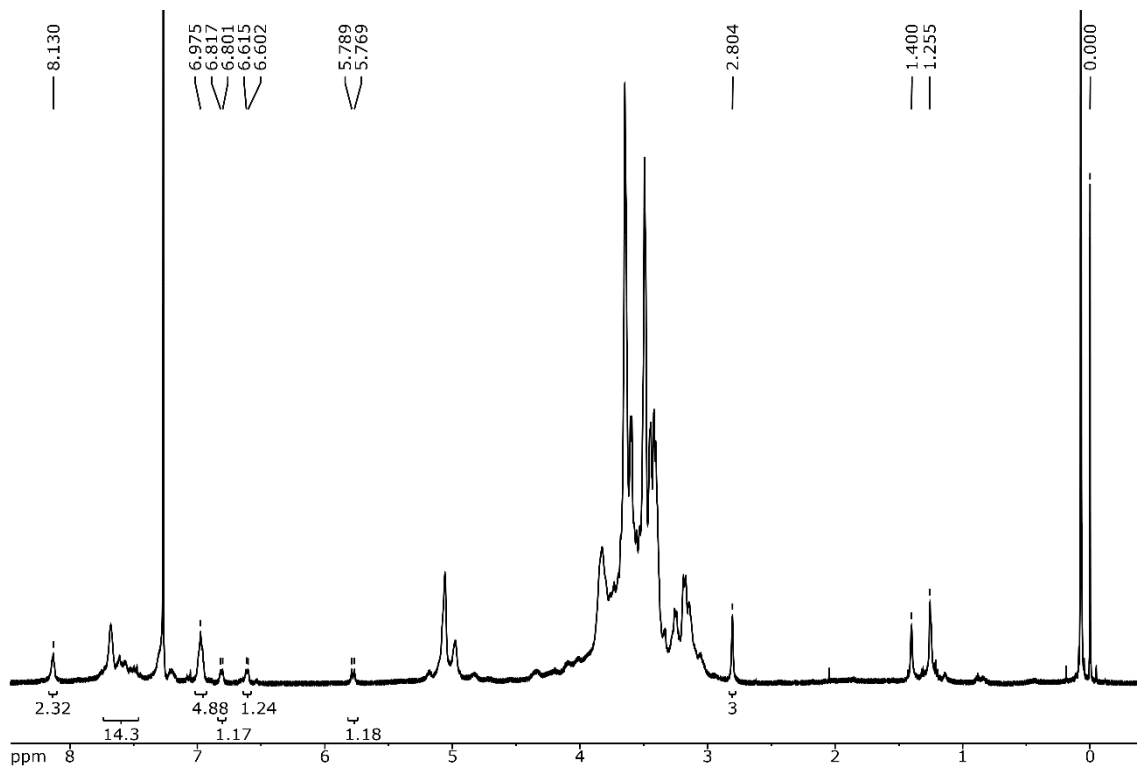

Figure S16.  $^1\text{H}$ -NMR spectrum of *unins*-SP-PPE (500 MHz,  $\text{CDCl}_3$ ).

### 3.10 NMR titration

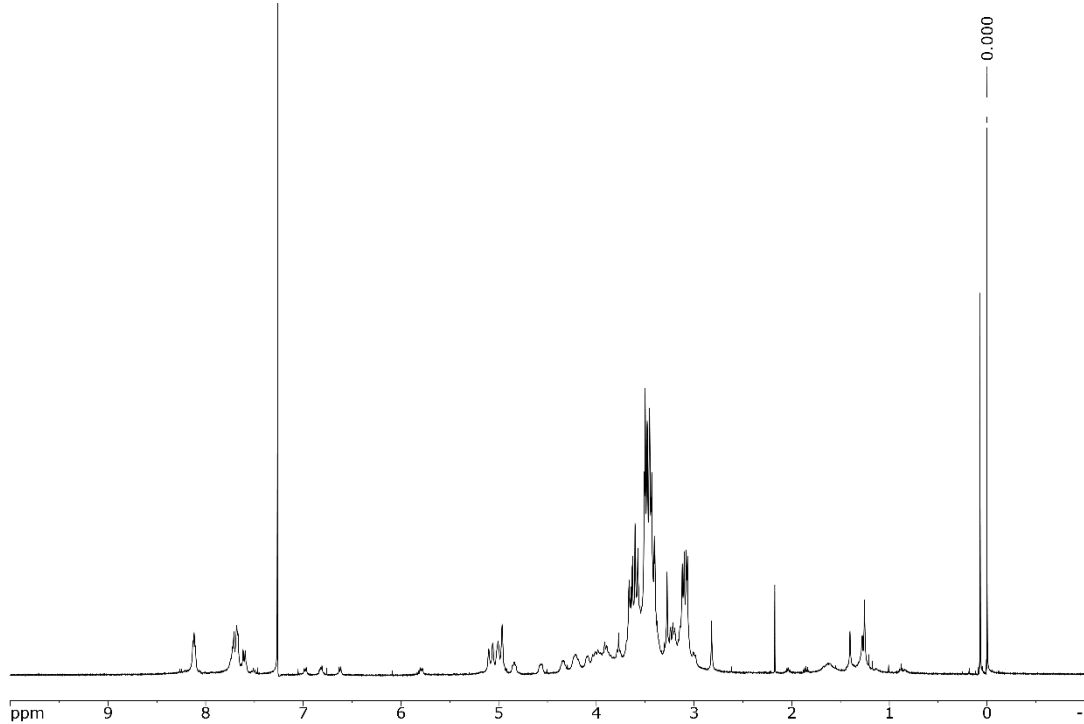

**Figure S17.** <sup>1</sup>H-NMR spectrum of *ins*-SP-PPE (500 MHz, CDCl<sub>3</sub>) before the addition of an acid.

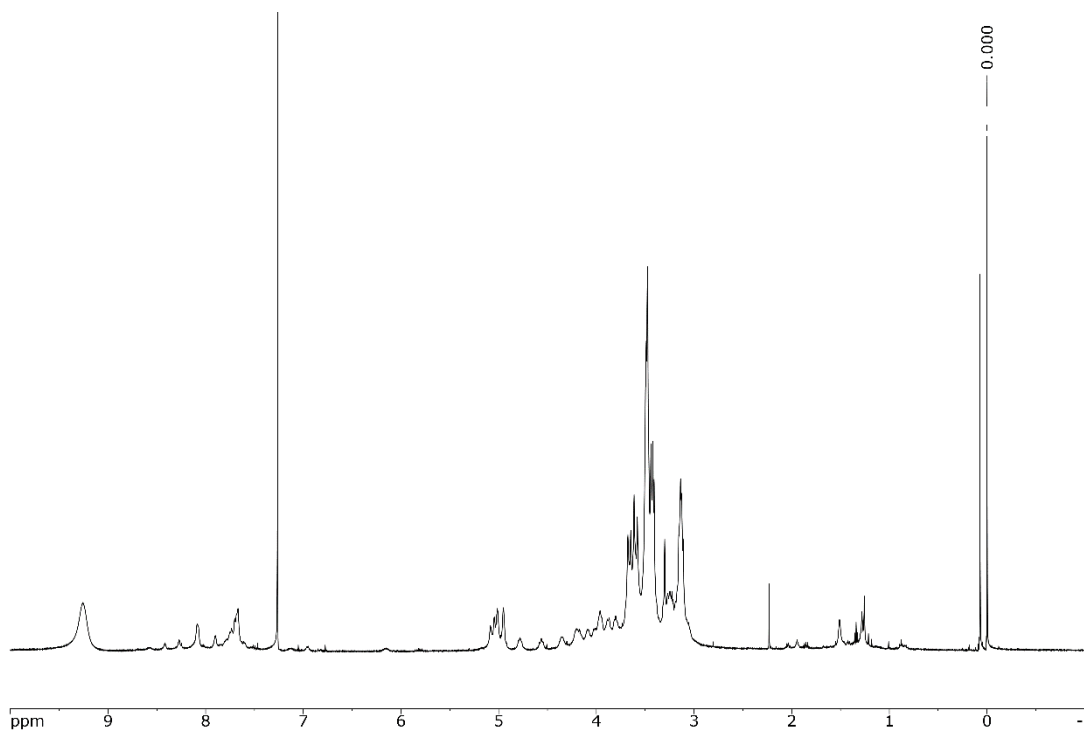

**Figure S18.** <sup>1</sup>H-NMR spectrum of *ins*-SP-PPE (500 MHz, CDCl<sub>3</sub>) after adding TFA (0.04 M).

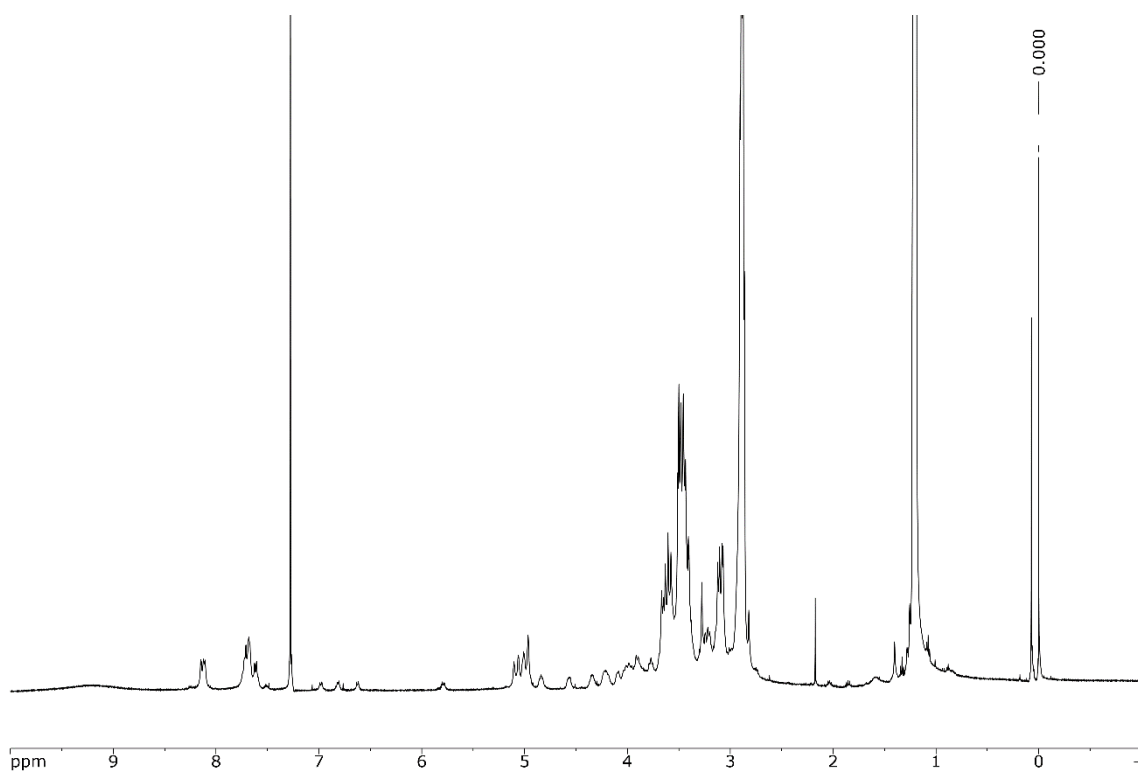

**Figure S19.** <sup>1</sup>H-NMR spectrum of *ins*-SP-PPE (500 MHz, CDCl<sub>3</sub>) after adding TFA (0.04 M) and then TEA (0.08 M).

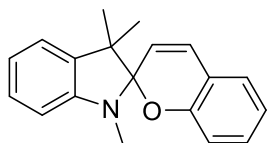

**Scheme S5.** A chemical structure of unsubstituted SP.

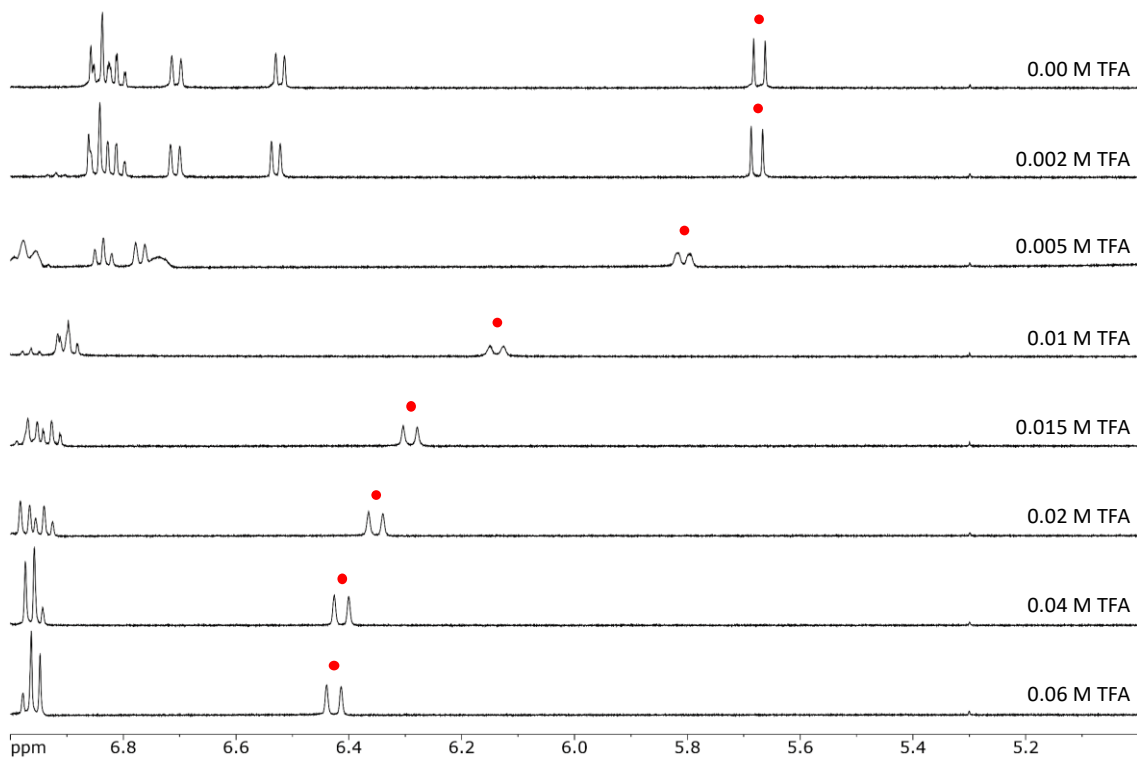

**Figure S20.**  $^1\text{H-NMR}$  spectra (aromatic region) of unsubstituted SP upon addition of different amounts of TFA (0 – 0.06 M). Red dots indicate signals deriving from vinyl protons of SP and  $\text{MCH}^+$ .

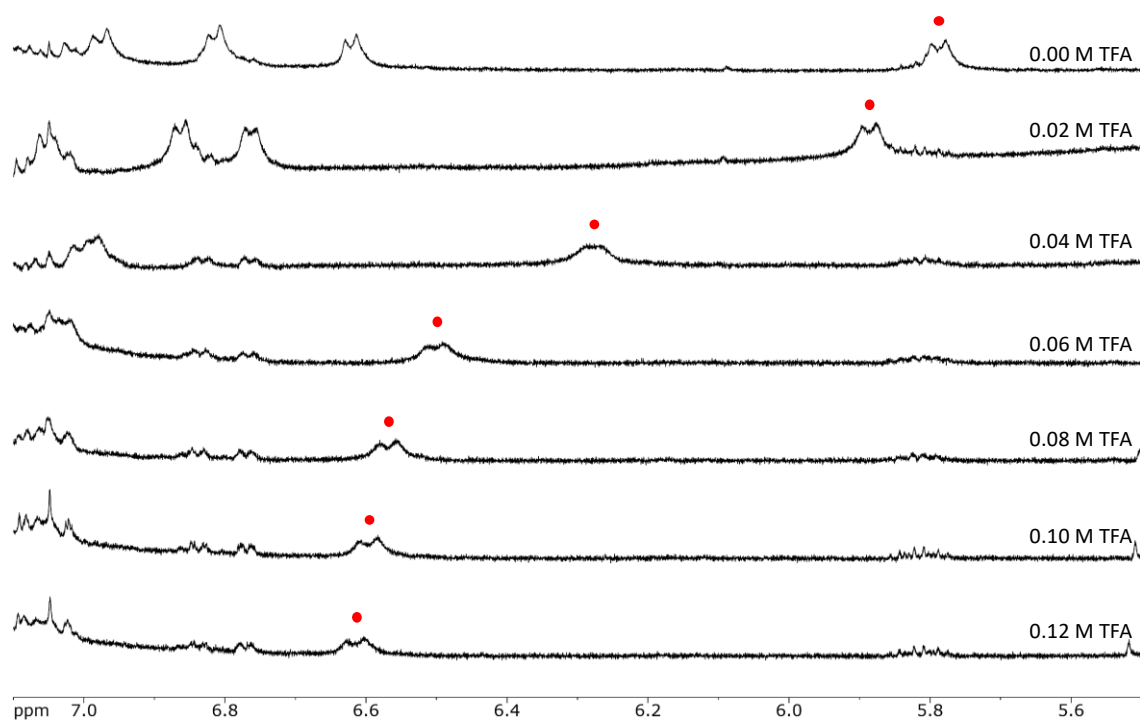

**Figure S21.** <sup>1</sup>H-NMR spectra (aromatic region) of *ins*-SP-PPE upon addition of different amounts of TFA (0 – 0.12 M). Red dots indicate signals deriving from vinyl protons of SP and MCH<sup>+</sup>.

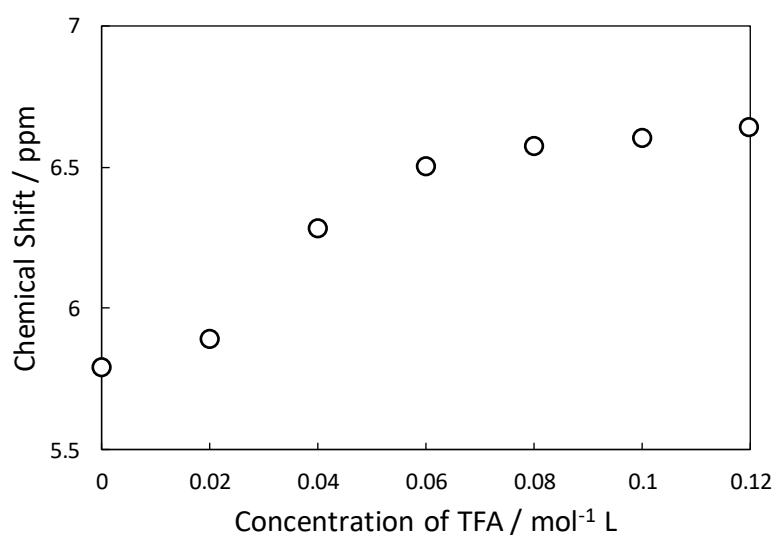

**Figure S22.** A chemical shift change of the signals of vinyl protons of SP and MCH<sup>+</sup> in *ins*-SP-PPE under the addition of TFA (0 – 0.12 M).

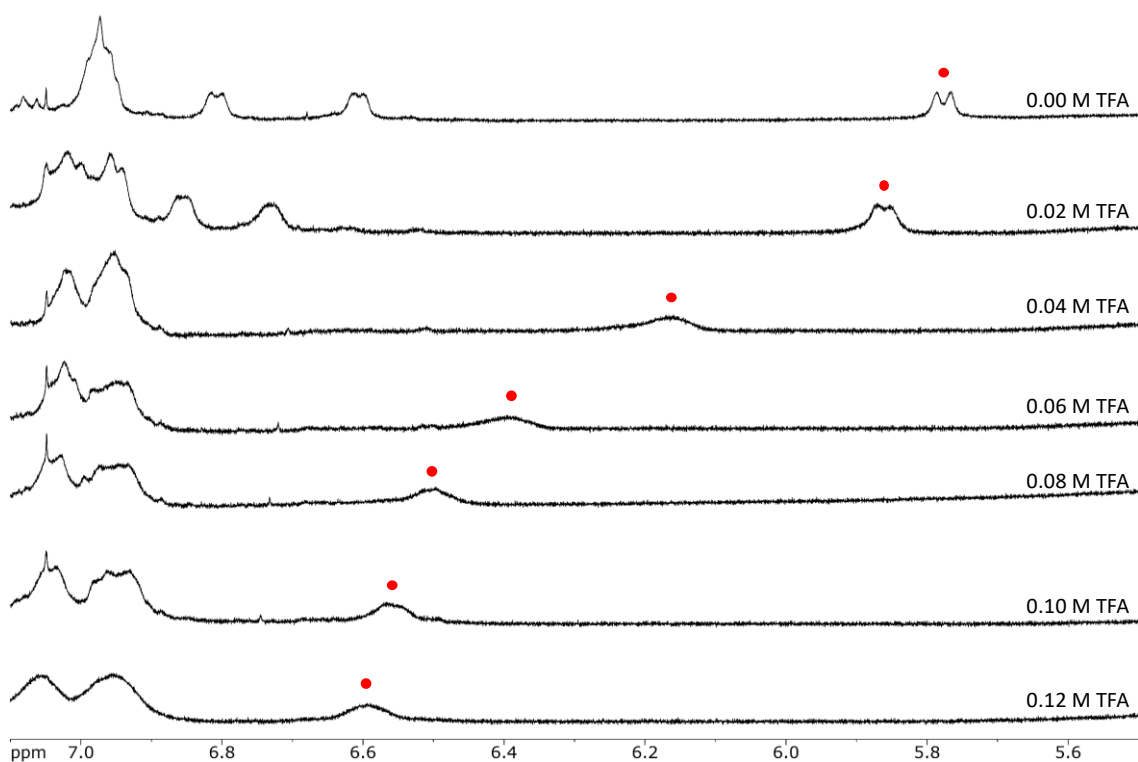

**Figure S23.** <sup>1</sup>H-NMR spectra (aromatic region) of *unins*-SP-PPE upon addition of different amounts of TFA (0 – 0.12 M). Red dots indicate signals deriving from a vinyl proton of SP and MCH<sup>+</sup>.

#### 4. GPC charts

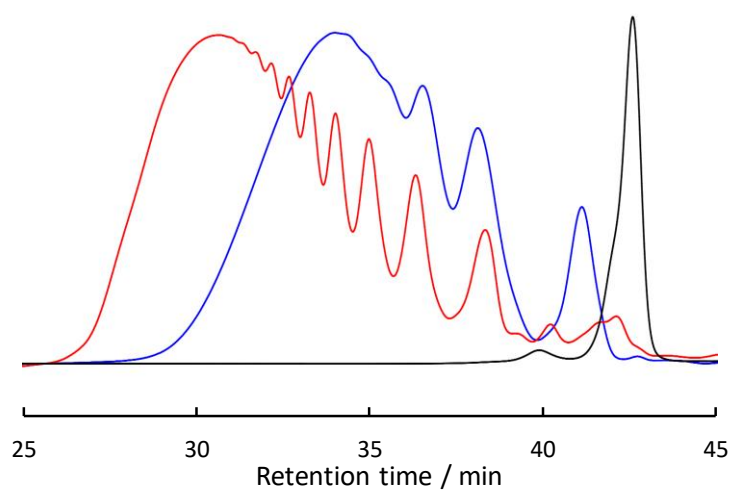

**Figure S24.** GPC analysis of monomer **8** (gray line), crude *ins*-SP-PPE (red line) and crude *unins*-SP-PPE (blue line) after polymerization.

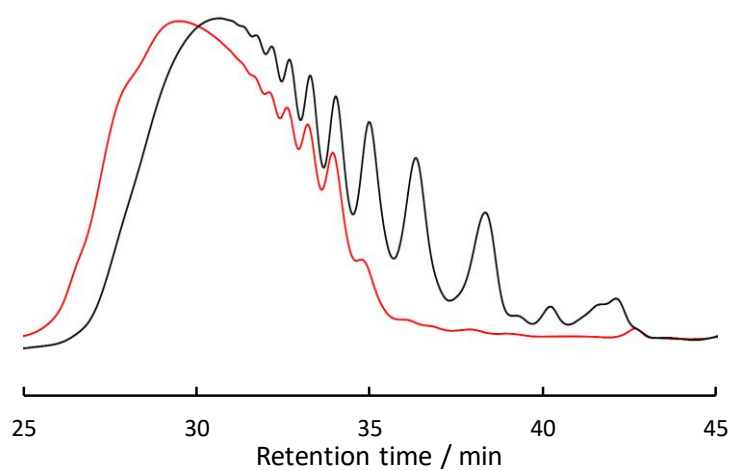

**Figure S25.** GPC analysis of crude (black line) and purified (red line) *ins*-SP-PPE.

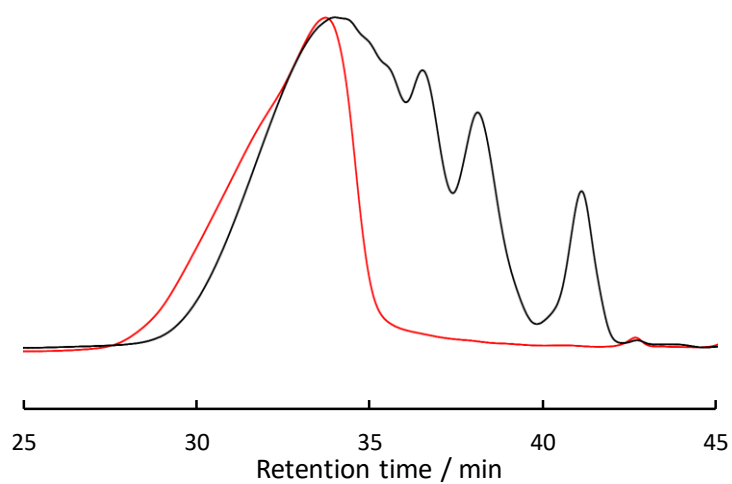

**Figure S26.** GPC analysis of crude (black line) and purified (red line) *unis*-SP-PPE.

## 5. UV-Vis spectra

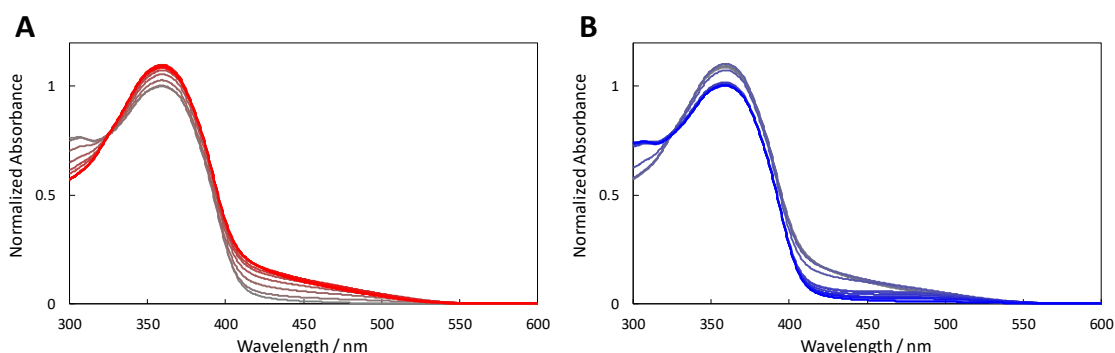

**Figure S27.** UV-Vis spectra of *unis*-SP-PPE ( $2.0 \times 10^{-5}$  M in  $\text{CH}_2\text{Cl}_2$ ) upon addition of different amounts of (A) TFA (0 – 0.2 M) and then (B) TEA (0 – 0.2 M).

## 6. Photoluminescence study

The acid-induced quenching of the emission of *ins*-SP-PPE was observed in the solution and solid states. In the solution, the quenching was not completely reversible (Figure S23), which may be caused by an incomplete conversion of  $\text{MCH}^+$  to SPs or partial photochromic isomerization of SPs to MCs. The quenching was also observed in *unis*-SP-PPE and was irreversible (Figure S24). The emission peak was blue-shifted after the addition of an acid and a base, which indicated the low durability of *unis*-SP-PPE. In the solid state, the quenched emission of the film was not able to completely recover by dipping the film to  $\text{NH}_3$  aqueous solution (Figure S25), which is consistent with the result in the solution.

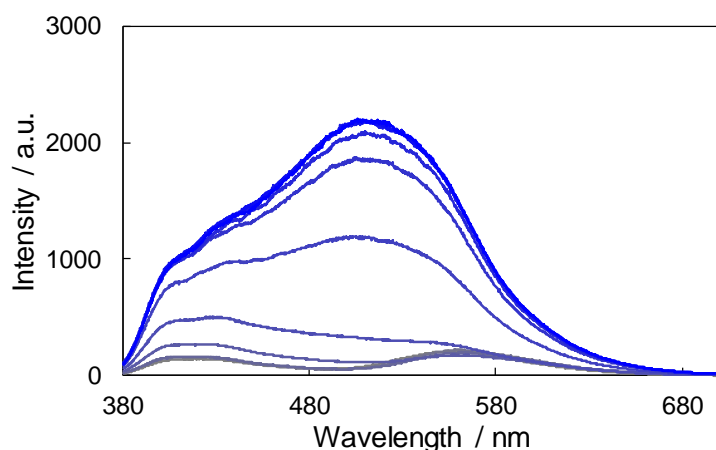

**Figure S28.** Emission spectra of *ins*-SP-PPE ( $2.0 \times 10^{-5}$  M in  $\text{CH}_2\text{Cl}_2$ ) upon adding different amount of TEA (0 – 0.2 M) after the addition of TFA (0.2 M).



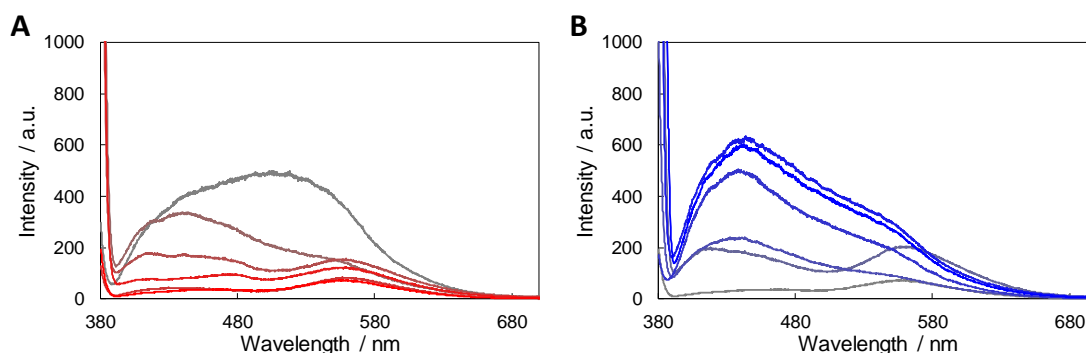

**Figure S29.** Emission spectra of *unins*-SP-PPE ( $2.0 \times 10^{-5}$  M in  $\text{CH}_2\text{Cl}_2$ ) upon adding different amount of (A) TFA (0 – 0.2 M) and then (B) TEA (0 – 0.2 M).

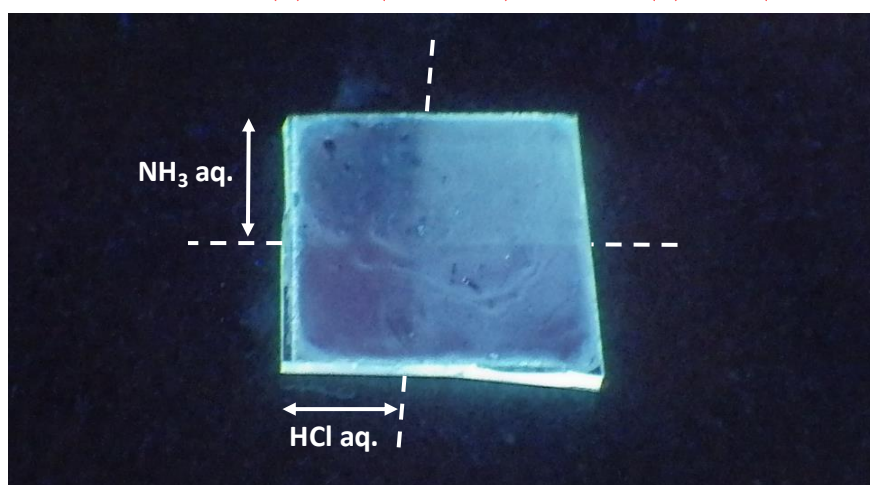

**Figure S30.** Fluorescence quenching and partial recovery

## 5. References

1. Terao, J.; Wadahama, A.; Fujihara, T.; Tsuji, Y. Synthesis of linked symmetric [3]rotaxane having an oligomeric phenylene–ethynylene unit as a  $\pi$  guest via double sonogashira cross-coupling. *Chem. Lett.* **2010**, *39*, 518–519.
2. Balmond, E. I.; Tautges, B. K.; Faulkner, A. L.; Or, V. W.; Hodur, B. M.; Shaw, J. T.; Louie, A. Y. Comparative Evaluation of Substituent Effect on the Photochromic Properties of Spiropyrans and Spirooxazines. *J. Org. Chem.* **2016**, *81*, 8744–8758.
3. Wu, I.-C.; Yu, J.; Ye, F.; Rong, Y.; Gallina, M.E.; Fujimoto, B.S.; Zhang, Y.; Chan, Y.-H.; Sun, W.; Zhou, X.-H.; Wu, C.; Chiu, D.T. Squaraine-Based Polymer Dots with Narrow, Bright Near-Infrared Fluorescence for Biological Applications. *J. Am. Chem. Soc.* **2014**, *137*, 173–178.
4. Walkey, M.C.; Byrne, L.T.; Piggott, M.J.; Low, P.J.; Koutsantonis, G.A. Enhanced bi-stability in a ruthenium alkynyl spiropyran complex. *Dalton Trans.* **2015**, *44*,

8812–8815.

5. Chang, K.-H.; Huang, C.-C.; Liu, Y.-H.; Hu, Y.-H.; Chou, P.-T.; Lin, Y.-C. Synthesis of photo-luminescent Zn(II) Schiff base complexes and its derivative containing Pd(II) moiety. *Dalton Trans.* **2004**, 1731–1738.
